# Supplementary material for: The extrinsic nature of double broadband photoluminescence from the BaTiO3perovskite: generation of white light emitters
Source: Royal Society of Chemistry journal article supplement (doi:10.1039/d1cp01765a), 2021-01-01
Supplement: d1cp01765a1.pdf [file d1cp01765a1.pdf]

## Supporting Information

### **Extrinsic nature of double broadband photoluminescence from BaTiO<sub>3</sub> perovskites: generation of white light emitters**

**J. L. Clabel H.<sup>a,\*</sup>, Gustavo Nicolodelli<sup>b</sup>, G.Lozano C.<sup>a</sup>, V. A. Garcia R.<sup>c</sup>, S. O. Ferreira<sup>d</sup>, Alexandre Pinto<sup>e</sup>, M. Siu Li<sup>a</sup>, E. Marega Jr.<sup>a</sup>**

<sup>a</sup> Physics Institute of São Carlos, University of São Paulo, P.O. Box 369,13560-970, São Carlos, SP, Brazil.

<sup>b</sup> Department of Physics, Federal University of Santa Catarina, P.O. Box 476, 88040-900, Florianópolis, SC, Brazil.

<sup>c</sup> Facultad de Ciencias Físicas, Universidad Nacional Mayor de San Marcos, UNMSM, Lima, Lima, Perú.

<sup>d</sup> Department of Physics, Federal University of Viçosa, UFV, P.O. Box 36570-901, Viçosa, MG, Brazil.

<sup>e</sup> Chemistry and Biochemistry Department, Manhattan College, Riverdale, NY 10471, USA.

\*Corresponding author email addresses: [jclabel@ifsc.usp.br](mailto:jclabel@ifsc.usp.br)

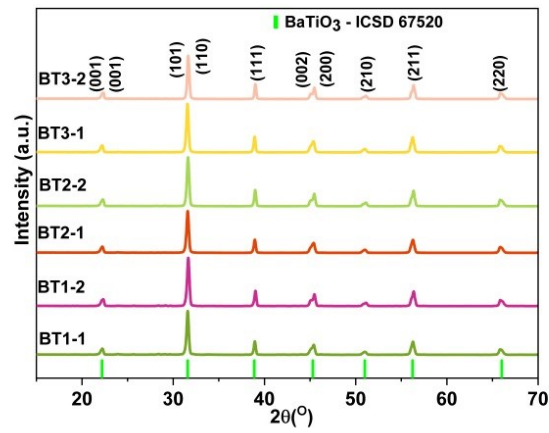

(a)

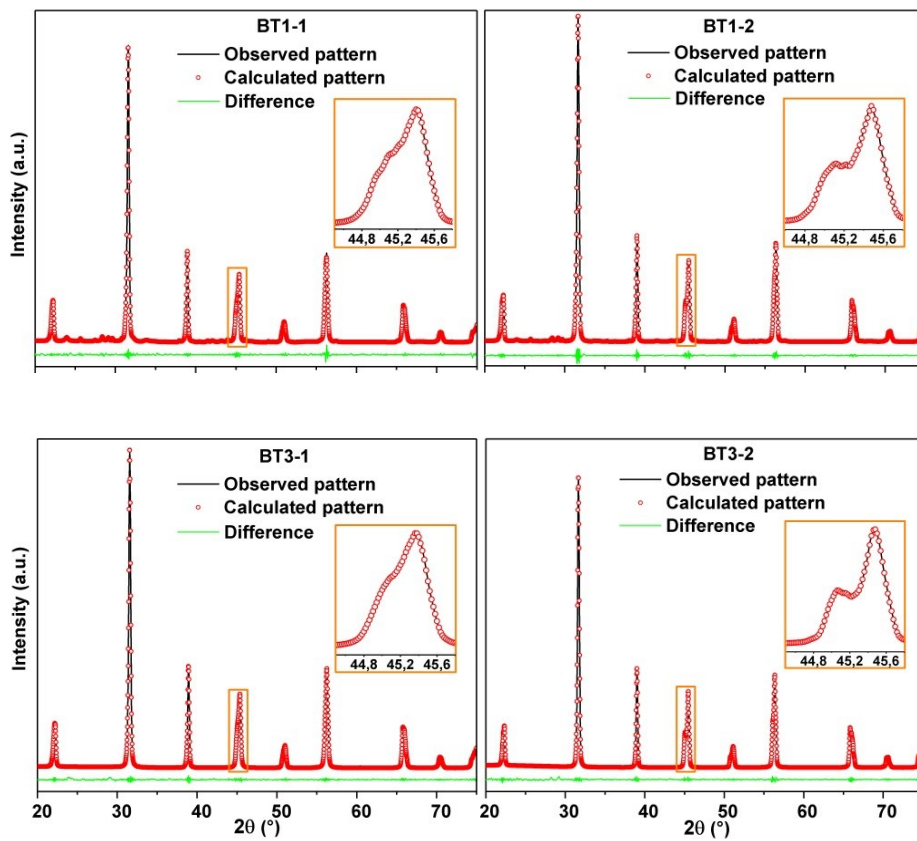

(b)

Figure S1. (a) X-ray diffraction patterns for different samples after thermal treatment, (b) Rietveld plots for different BaTiO<sub>3</sub> samples (BT1-1, BT1-2, BT3-1 and BT3-2). The amplification of X-ray diffraction profile from 44 – 46 °C in 2θ. (data extracted from the reference <sup>1</sup>)

**Table S1. Refined structural parameters and respective agreement factors of the refinement to the BaTiO<sub>3</sub> samples. (data extracted from the reference <sup>1</sup>)**

| Crystallographi data | Space group | Volume (Å <sup>3</sup> ) | a, b (Å)   | c (Å)      | R <sub>Bragg</sub> (%) | R <sub>wp</sub> (%) | R <sub>exp</sub> (%) | χ <sup>2</sup> |
|----------------------|-------------|--------------------------|------------|------------|------------------------|---------------------|----------------------|----------------|
| BT1-1                | P4/mm       | 64.390(4)                | 3.99899(9) | 4.02642(1) | 3.83                   | 15.92               | 11.48                | 1.38           |
| BT1-2                | P4/mm       | 64.390(6)                | 3.99746(2) | 4.02950(2) | 3.05                   | 15.10               | 11.61                | 1.30           |
| BT2-1                | P4/mm       | 64.394(5)                | 3.99923(1) | 4.02616(2) | 5.10                   | 11.83               | 11.72                | 1.01           |
| BT2-2                | P4/mm       | 64.364(5)                | 3.99685(1) | 4.02905(1) | 3.53                   | 11.88               | 11.22                | 1.06           |
| BT3-1                | P4/mm       | 64.391(5)                | 3.99898(1) | 4.02544(1) | 3.53                   | 11.48               | 11.28                | 1.02           |
| BT3-2                | P4/mm       | 64.394(5)                | 3.99744(1) | 4.02965(1) | 5.12                   | 13.08               | 12.11                | 1.08           |

**Table S2. Raman mode frequency in BaTiO<sub>3</sub>.**

| Raman modes                | BT1-1                 |                          |                      | BT1-2                 |                          |                      | BT2-1                 |                          |                      |
|----------------------------|-----------------------|--------------------------|----------------------|-----------------------|--------------------------|----------------------|-----------------------|--------------------------|----------------------|
|                            | ω (cm <sup>-1</sup> ) | FWHM (cm <sup>-1</sup> ) | M <sub>I</sub> (a.u) | ω (cm <sup>-1</sup> ) | FWHM (cm <sup>-1</sup> ) | M <sub>I</sub> (a.u) | ω (cm <sup>-1</sup> ) | FWHM (cm <sup>-1</sup> ) | M <sub>I</sub> (a.u) |
| A <sub>1</sub> (TO)        | 162.03                | 60.46                    | 4522.82              | 159.53                | 57.55                    | 7391.60              | 158.88                | 59.28                    | 5555.43              |
| E(TO)                      | 224.03                | 114.62                   | 8469.64              | 208.47                | 100.10                   | 9718.41              | 202.23                | 105.55                   | 8300.67              |
| A <sub>1</sub> (TO)        | 279.47                | 57.40                    | 3550.15              | 266.89                | 98.03                    | 18477.8              | 266.07                | 106.33                   | 16173.98             |
| E(TO+LO)                   | 307.45                | 9.77                     | 2028.39              | 306.61                | 17.97                    | 6173.7               | 307.03                | 17.04                    | 5096.16              |
| B <sub>1</sub>             | 321.23                | 163.30                   | 6609.86              | 351.83                | 143.44                   | 5076.88              | 352.98                | 138.36                   | 4281.93              |
| E(TO), A <sub>1</sub> (TO) | 514.04                | 51.31                    | 5542.11              | 513.81                | 39.03                    | 10997.3              | 514.96                | 40.37                    | 9813.89              |
|                            | 573.53                | 107.26                   | 3657.21              | 543.05                | 61.86                    | 5452.10              | 544.49                | 65.09                    | 4476.71              |
|                            | 647.32                | 25.09                    | 667.83               | 613.38                | 149.58                   | 2851.87              | 615.56                | 157.34                   | 2516.17              |
| E(LO), A <sub>1</sub> (LO) | 714.12                | 83.04                    | 1486.13              | 715.28                | 59.75                    | 2596.76              | 715.03                | 63.55                    | 2111.20              |

|                            | BT2-2                 |                          |                      | BT3-1                 |                          |                      | BT3-2                 |                          |                      |
|----------------------------|-----------------------|--------------------------|----------------------|-----------------------|--------------------------|----------------------|-----------------------|--------------------------|----------------------|
|                            | ω (cm <sup>-1</sup> ) | FWHM (cm <sup>-1</sup> ) | M <sub>I</sub> (a.u) | ω (cm <sup>-1</sup> ) | FWHM (cm <sup>-1</sup> ) | M <sub>I</sub> (a.u) | ω (cm <sup>-1</sup> ) | FWHM (cm <sup>-1</sup> ) | M <sub>I</sub> (a.u) |
| A <sub>1</sub> (TO)        | 159.17                | 57.74                    | 13904.54             | 159.89                | 53.71                    | 5656.56              | 164.29                | 53.51                    | 11692.72             |
| E(TO)                      | 205.24                | 90.85                    | 16223.15             | 204.88                | 99.55                    | 8161.52              | 211.77                | 78.70                    | 14273.95             |
| A <sub>1</sub> (TO)        | 259.80                | 111.35                   | 27508.34             | 265.07                | 96.39                    | 15849.0              | 263.11                | 80.21                    | 23094.66             |
| E(TO+LO)                   | 304.86                | 19.55                    | 9191.97              | 307.30                | 17.11                    | 5139.45              | 305.90                | 27.79                    | 10417.84             |
| B <sub>1</sub>             | 341.60                | 183.89                   | 14647.59             | 340.85                | 159.09                   | 4839.53              | 347.01                | 127.69                   | 8171.07              |
| E(TO), A <sub>1</sub> (TO) | 508.79                | 39.66                    | 15136.09             | 514.77                | 38.45                    | 10102.6              | 515.03                | 39.03                    | 15474.55             |
|                            | 541.83                | 73.20                    | 10703.58             | 544.33                | 61.50                    | 4714.90              | 544.09                | 62.65                    | 7232.21              |
|                            | 610.65                | 133.67                   | 4908.79              | 618.70                | 151.09                   | 2530.13              | 608.63                | 127.78                   | 3219.86              |
| E(LO), A <sub>1</sub> (LO) | 714.98                | 76.68                    | 4312.00              | 715.61                | 58.19                    | 2241.09              | 715.97                | 79.77                    | 3587.99              |

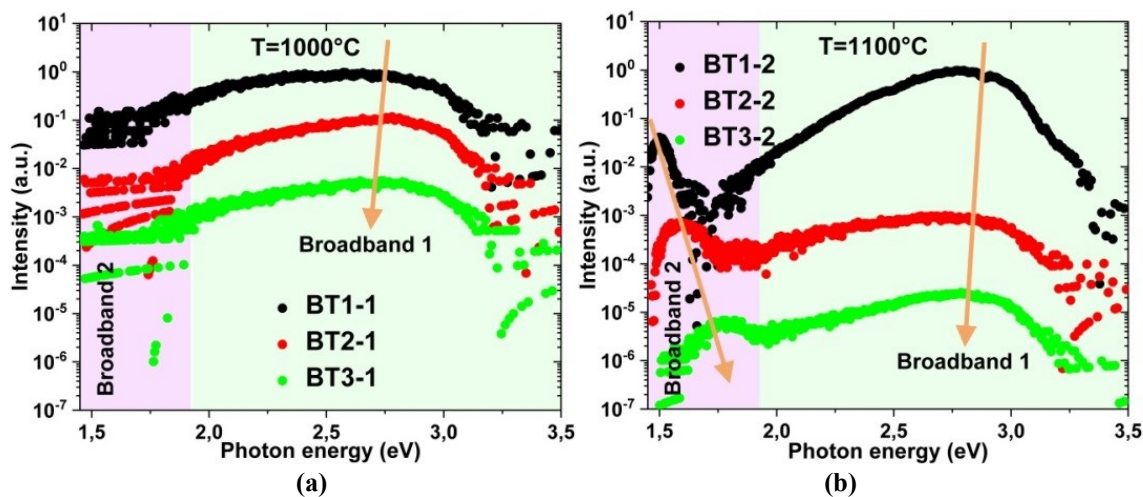

Fig. S2. Luminescence spectra of BT powder at 1000°C and 1100°C on the log scale.

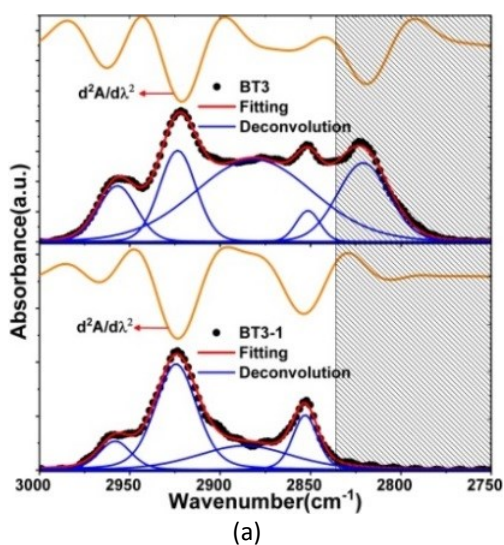

Figure S3. Fragments of FTIR spectra and deconvolution spectral bands (solid blue line) in the region between 3000 to 2750  $\text{cm}^{-1}$ . BT3 represent the sample as mixture without thermal treatment, while BT3-1 was thermal treatment at 1000°C.

## Reference

- 1 J. L. Clabel H, I. T. Awan, A. H. Pinto, I. C. Nogueira, V. D. N. Bezzon, E. R. Leite, D. T. Balogh, V. R. Mastelaro, S. O. Ferreira and E. Marega, *Ceram. Int.*, 2020, **46**, 2987–3001.
